# Supplementary material
Source: publisher figshare collection journal article supplement (https://gsapubs.figshare.com/articles/dataset/_/21620850)

# Elemental 1:1 Plots

## Bailey (1989) vs. Wolff et al. (2008)

### MAJOR ELEMENTS

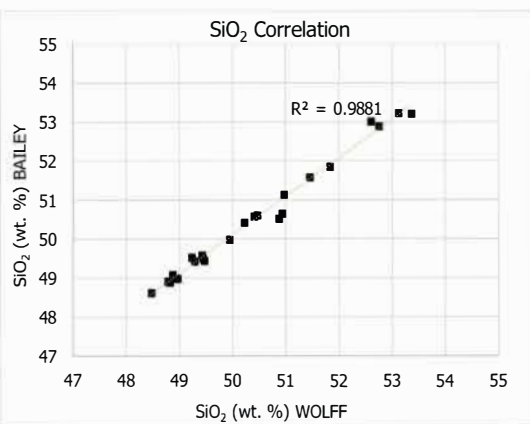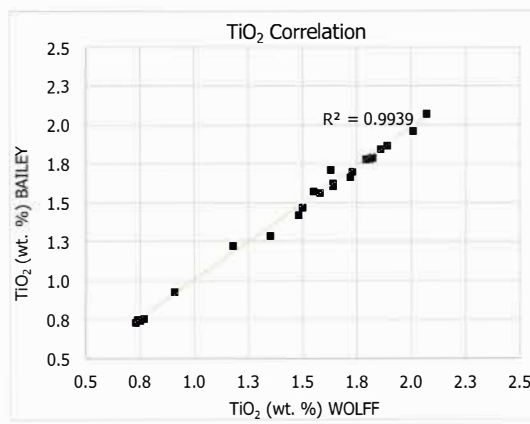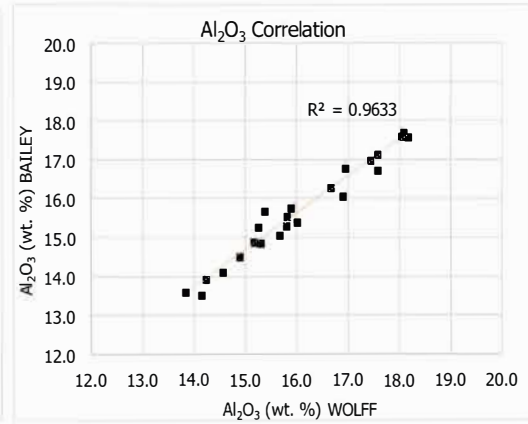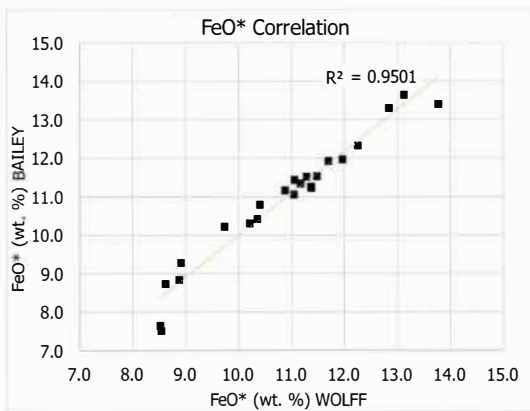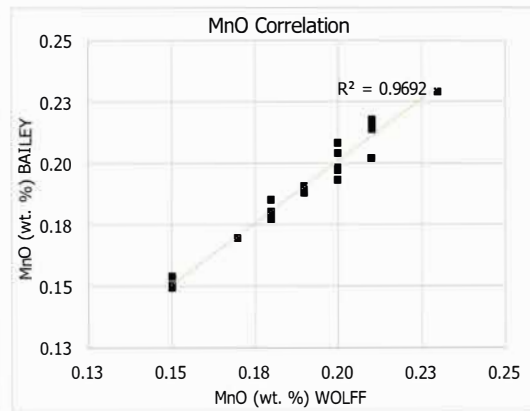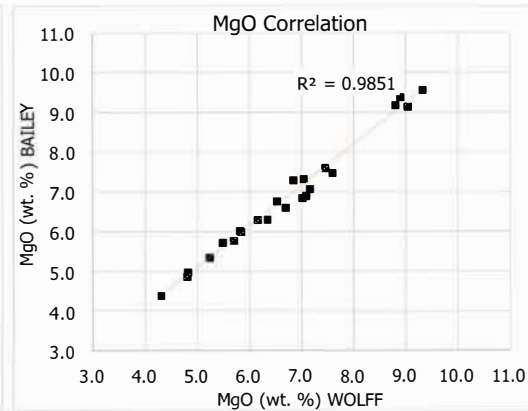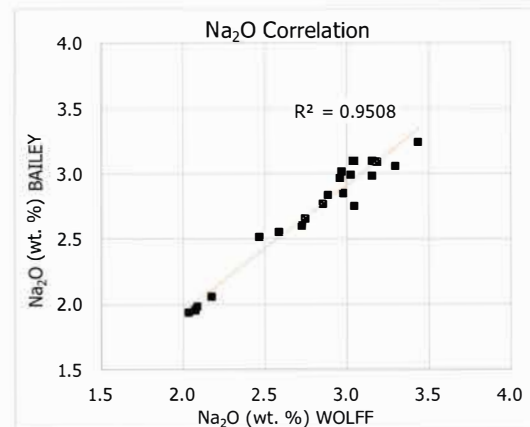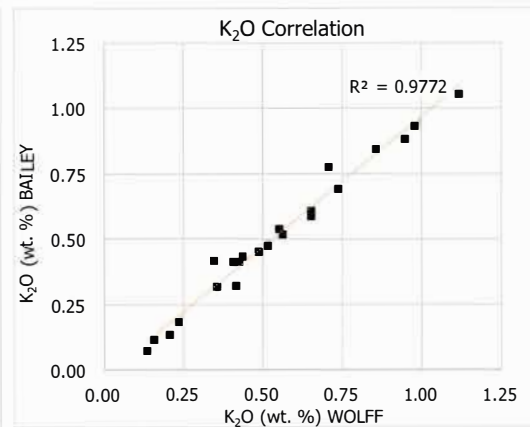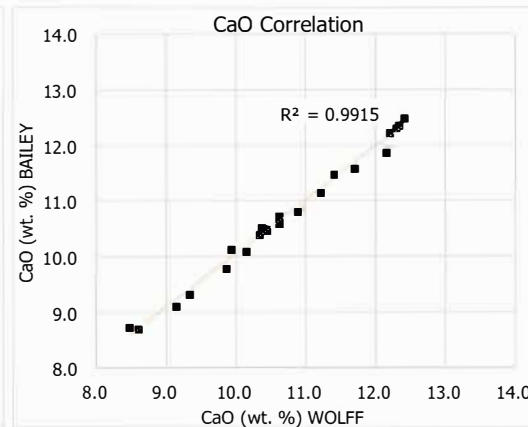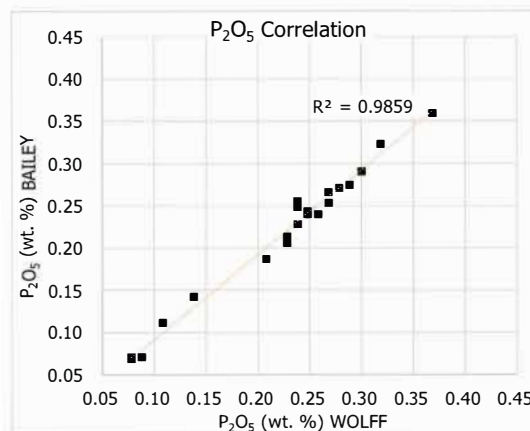

Total samples compared:23

| Chemical type       | sample # | Chemical type    | sample # |
|---------------------|----------|------------------|----------|
| Bologna Creek       | BBJ55    | unassigned Dale  | BBJ304   |
| Muleshoe Creek      | BBJ65    | Branson Creek    | BBJ305   |
| Donnelly Basin      | BBJ189   | Monument Lookout | BBJ315   |
| Camas Creek         | BBJ69    | Dale             | MMB32    |
| Holmes Creek        | BBJ92    | Horse Canyon     | MMB40    |
| Franklin Mtn        | BBJ104   | Bologna Dike     | MMBD25   |
| Stony Creek         | MMB92    | High-Mg Dike     | MMBD69A  |
| Windy Canyon        | BBJ168   | High-Mg Dike     | MMBD69B  |
| Johnny Cake Mtn     | BBJ170   | High-Mg Dike     | MMBD70A  |
| Alder Mtn           | BBJ210   | High-Mg Dike     | MMBD70B  |
| Little Tamarack Mtn | BBJ279   |                  |          |
| Tamarack Mtn        | BBJ282   |                  |          |
| Hamilton            | BBJ285   |                  |          |

# TRACE ELEMENTS

## XRF vs. XRF Data

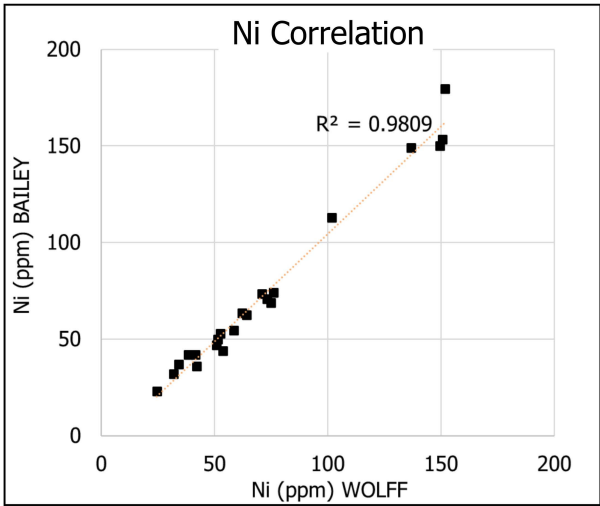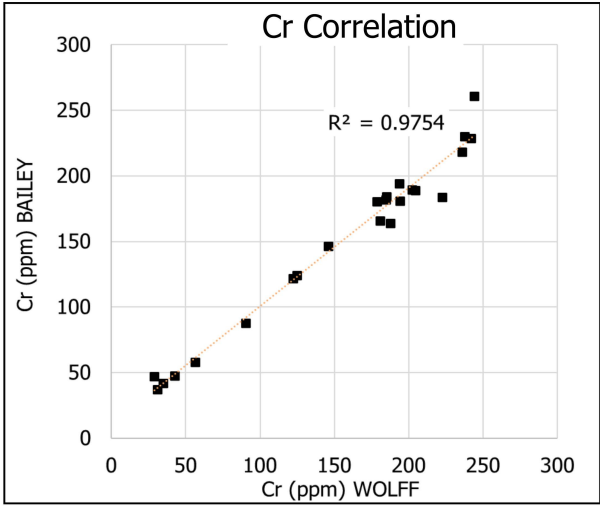

## XRF vs. ICP-MS Data

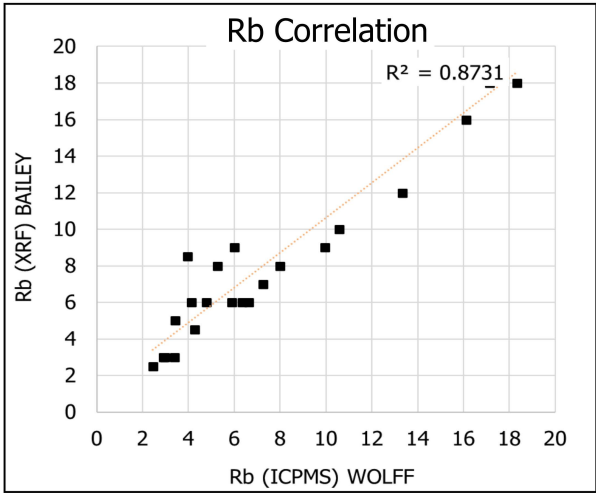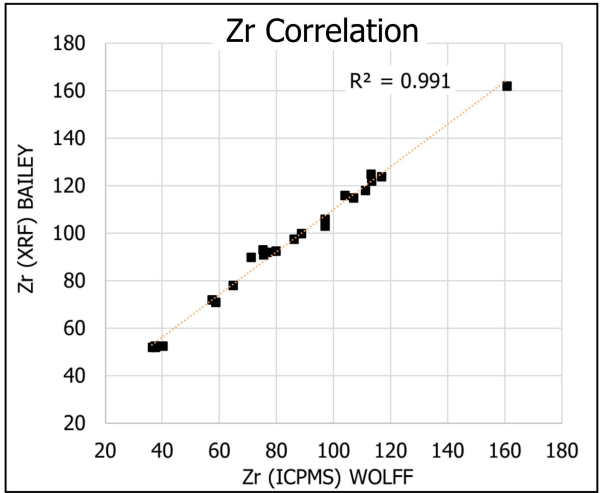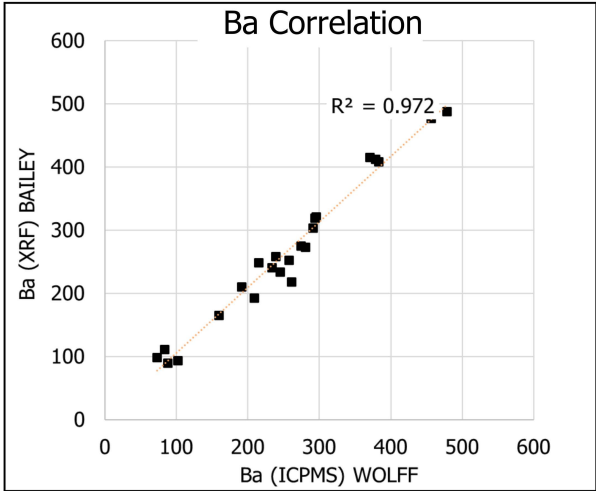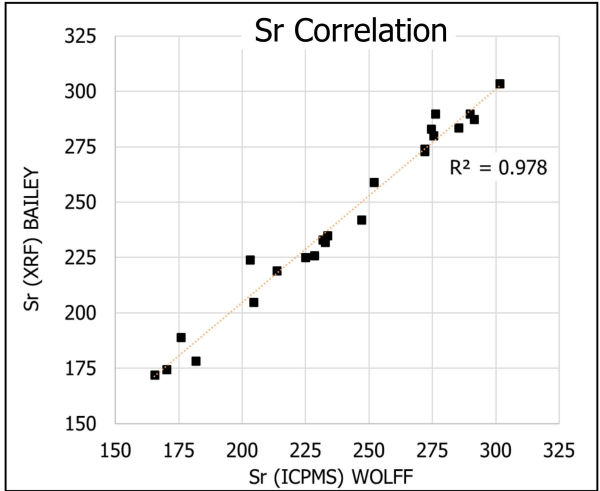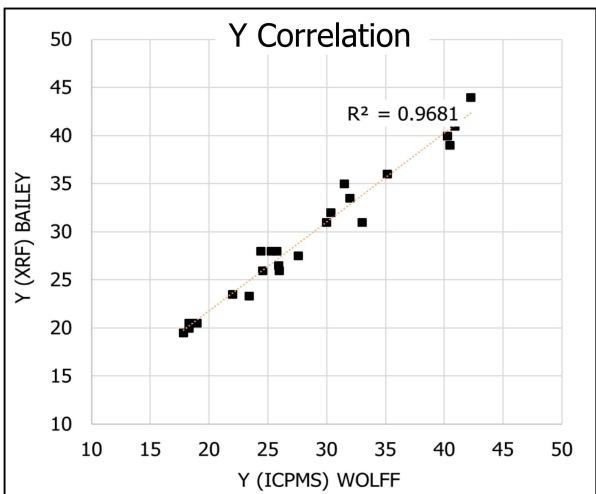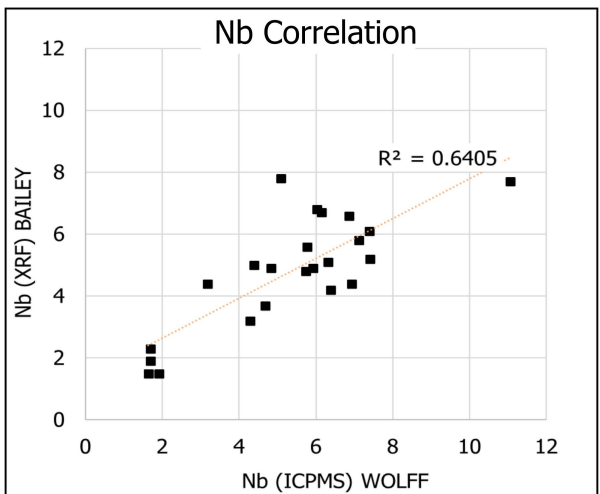

Supplement: Supplementary file 2 [file 2]
