# Supplementary material
Source: publisher figshare collection journal article supplement (https://gsapubs.figshare.com/articles/dataset/_/21620850)
Supplement: Supplementary file 1 [file 2]

## Sheet: Appendix A
Sample ID	CAH15-005	CAH15-007	CAH15-008	CAH15-017	CAH15-018	CAH15-019	CAH15-020	CAH15-021	CAH15-022	CAH15-023	CAH15-024	CAH15-025	CAH15-026	CAH15-027	CAH15-028	CAH15-031	CAH15-032	CAH15-033	CAH15-036	CAH15-037	CAH15-038	CAH15-043	MS-15-18BA	MS-11-6	CAH16-062	CAH16-063	CAH16-064	CAH16-065	CAH16-072	CAH16-073A	CAH16-074	CAH16-075	CAH16-081	CAH16-099C	CAH16-105	CAH16-111	CAH16-112	CAH16-117	CAH16-121	CAH16-122	CAH16-123	CAH16-132	CAH16-138	CAH16-139	CAH16-140	CAH16-142	CAH16-146A	CAH16-148	CAH16-149
DIKE VS FLOW	*	Dike*	Dike*	Dike	Dike*	Dike*	Dike	Dike*	Dike*	Dike*	Dike	Dike*	Dike*	Dike*	Dike*	*	*	*	Dike*	Dike	*	Flow*	Flow	Dike	Flow	Flow	Flow	Flow	Flow	Dike*	Flow	Flow	Flow	Flow	Flow	Flow	Flow	Flow	Flow	Dike*	Flow	Flow	Dike	Dike	Flow	Flow	*	Flow	*
Area 1	extended	extended	extended	original	original	original	original	original	original	original	original	original	original	original	original	original	original	original	original	original	original	extended	extended	extended	extended	extended	extended	extended	extended	extended	extended	extended	extended	extended	extended	extended	extended	extended	extended	extended	extended	extended	original	original	original	extended	extended	extended	extended
PCA prediction 2	high MgO	high MgO	Monument Mtn	Dayville (Hamilton)	Monument Mtn	Monument Mtn	Dayville (Windy)	Dayville (Horse)	Dayville (Dale)	Dayville (Dale)	Dayville (Monument LO)	Dayville (Johnny)	Monument Mtn	Dayville (Horse)	Dayville (Horse)	Monument Mtn	Dayville (Hamilton)	Twickenham	Dayville (Horse)	Dayville (Hamilton)	Dayville (Hamilton)	Dayville (Tam Mtn)	Dayville (Tam Mtn)	Dayville (Tam Mtn)	Dayville (Alder)	Dayville (Alder)	Dayville (Alder)	Dayville (Alder)	Twickenham	Twickenham	Dayville (Alder)	Dayville (Alder)	Dayville (Tam Mtn)	Twickenham	Dayville (Tam Mtn)	Dayville (Alder)	Dayville (Alder)	Dayville (Tam Mtn)	Dayville (Tam Mtn)	Dayville (Windy)	Dayville (Tam Mtn)	Dayville (Johnny)	Dayville (Dale)	Dayville (Horse)	Dayville (Tam Mtn)	Twickenham	Twickenham	Monument	Twickenham
Study 3																							Streck, unpub.	Cahoon et al., 2020
Latitude	43.9659	43.9883	44.0317	44.2969	44.3088	44.3107	44.3128	44.311	44.3125	44.315	44.317	44.3205	44.3369	44.3349	44.3354	44.3178	44.3218	44.3792	44.4227	44.3566	44.3514	43.9137	43.7033	44.0317	43.8661	43.8664	43.8671	43.8681	43.8658	43.8486	43.8498	43.8505	43.8891	43.9158	44.0562	44.0774	44.0793	44.0986	44.0171	43.9131	44.0177	43.972	44.1514	44.1422	44.1372	43.9954	44.0132	44.0008	43.9818
Longitude	-119.076	-119.137	-119.23	-119.275	-119.298	-119.302	-119.306	-119.308	-119.313	-119.317	-119.324	-119.333	-119.349	-119.353	-119.354	-119.264	-119.27	-119.314	-119.305	-119.32	-119.31	-118.843	-118.803	-119.23	-117.968	-117.968	-117.968	-117.966	-117.97	-117.959	-117.958	-117.957	-119.588	-119.6	-119.076	-119.113	-119.113	-119.159	-119.132	-119.05	-119.171	-119.3	-119.276	-119.29	-119.292	-119.159	-119.246	-119.276	-119.313
Preferred Age (Ma)		16.22								16.88														16.06				16.72															16.7					16.62
Error (2 sigma)		0.06								0.06														0.14				0.03															0.09					0.07
Alteration Index (Baksi, 2007) sample NOT exposed to HF		0.000689227								0.000269508														0.00353306				0.000694491															0.000618686					0.000192225
Alteration Index (Baksi, 2007) sample exposed to HF		N/A								0.0206475														0.0111127				0.00146891															0.00583931					0.0135188
XRF wt% (normalized)
SiO2	50.1952	49.5847	50.851	51.7179	50.6692	51.3154	50.5503	51.7459	50.124	50.4032	50.6651	52.6959	51.2768	51.4225	51.2212	50.8828	52.6938	49.1845	51.7779	52.216	52.1425	48.622	53.5561	50.16	51.6357	51.6969	52.0766	51.8288	49.6267	49.2043	52.208	52.1417	50.3481	50.4679	48.5899	51.25	52.6832	48.6542	49.0302	51.5658	48.7067	52.2961	50.6585	51.5449	51.551	48.7965	49.7119	51.0637	49.4912
TiO2	0.830525	0.913809	1.49634	2.24592	1.54005	1.48087	1.78012	1.48483	1.09748	1.1383	1.65499	1.91995	1.45077	1.69593	1.68673	1.50889	2.09603	1.72621	1.55445	2.00318	1.99108	1.30654	0.920887	1.274	1.66224	1.68509	1.80901	2.08574	1.24635	1.4449	1.81172	1.8276	1.06911	1.24259	1.03206	1.14271	1.18775	1.10929	1.13018	1.585	1.03785	2.20329	1.02968	1.51195	1.17964	1.07435	2.02296	1.56965	1.67598
Al2O3	17.2811	17.3721	15.1991	13.6737	15.733	15.5057	15.6109	15.0417	16.5134	16.313	15.3776	14.0929	15.25	15.1025	15.2443	15.3816	13.7788	15.9687	14.6637	13.9325	13.9018	17.7497	16.7758	16.88	15.1743	15.1517	14.6601	14.8081	17.4097	16.7607	14.6521	14.6595	17.7713	17.002	17.4074	17.4848	17.5028	17.5893	17.2335	15.6815	17.5561	14.4082	19.1311	14.8408	16.3487	17.9104	15.0194	15.6089	15.932
FeO*	9.42427	9.64015	11.3684	14.4905	11.1568	11.1684	12.3813	11.611	10.0156	10.3441	12.829	13.1352	11.5831	12.6086	12.3874	11.0464	13.9697	11.5163	12.1535	13.8498	13.8457	11.0147	8.48615	10.59	11.1351	11.191	11.4717	11.9834	9.44256	11.2284	11.395	11.4323	9.53366	9.7885	10.7955	10.4879	10.255	11.2069	11.1093	11.1664	10.9759	12.5363	8.2508	11.7109	9.7429	10.9767	11.9662	10.98	11.4743
MnO	0.218236	0.170245	0.201125	0.249652	0.199063	0.186666	0.217485	0.200493	0.173655	0.180646	0.216103	0.212839	0.194829	0.214742	0.202243	0.194985	0.235749	0.192743	0.446756	0.225786	0.232288	0.182906	0.152934	0.187	0.191697	0.185496	0.190914	0.17766	0.166561	0.181443	0.205531	0.193686	0.158691	0.145397	0.180355	0.171477	0.174501	0.180621	0.192016	0.195835	0.175407	0.227399	0.147165	0.177967	0.181045	0.19022	0.207927	0.204104	0.183305
MgO	6.13479	9.80681	6.12591	4.64256	5.89039	6.27221	5.37116	5.87507	7.93324	7.40451	5.33636	4.31165	6.09734	5.3924	5.46072	6.52505	4.33134	6.81676	5.29999	4.73926	4.7943	7.3367	6.79035	6.75	6.20648	6.09328	5.74356	5.33366	7.94638	7.77118	5.66323	5.68672	7.46493	7.50557	9.17967	5.78054	4.84135	7.79048	8.06899	5.59413	8.81271	4.6697	4.66812	5.70493	6.84747	8.48648	6.43294	6.1094	7.30495
CaO	12.9494	9.94523	11.0747	9.1354	11.3466	10.4768	10.1738	10.0173	11.0111	10.8849	9.9878	8.59393	10.2115	9.35988	9.56736	10.5939	8.47281	10.9427	9.86338	8.78386	8.84817	10.2461	9.39039	10.71	9.87124	9.90351	9.58997	9.14678	10.2779	9.9875	9.58658	9.63216	9.97022	9.86612	9.85919	9.40575	8.49884	10.4937	9.91397	10.1696	9.79204	8.42154	13.0133	10.5051	10.6435	9.51394	11.0539	10.5502	10.5194
Na2O	2.53418	2.19641	3.06455	2.79616	2.88014	2.94315	2.91299	3.07045	2.52421	2.70069	2.93976	3.60462	3.04203	3.16169	3.17458	3.02745	2.98715	2.93884	2.95955	2.9979	3.01105	3.10936	2.68265	2.71	3.04703	3.05764	3.18076	3.33568	2.88351	2.57069	3.17566	3.30669	2.83772	3.02982	2.40625	3.25208	3.58079	2.20612	2.73319	3.06405	2.46832	3.40855	2.60666	3.09448	2.75697	2.24709	2.89777	2.95061	2.74966
K2O	0.281273	0.223179	0.410226	0.69196	0.35604	0.432534	0.685781	0.72193	0.458755	0.488096	0.7221	1.13429	0.671027	0.746201	0.756588	0.614167	1.0579	0.459789	1.03578	0.9168	0.896714	0.255109	1.01803	0.55	0.840862	0.796329	1.0136	0.954773	0.639645	0.666193	1.04131	0.854325	0.58748	0.642218	0.374294	0.73954	0.875966	0.555389	0.385533	0.746214	0.297877	1.46522	0.361463	0.661318	0.559378	0.602742	0.373343	0.705358	0.440192
P2O5	0.15108	0.147325	0.208671	0.356226	0.228593	0.218325	0.316169	0.231283	0.148505	0.142635	0.271272	0.298725	0.222638	0.295484	0.298929	0.224819	0.376786	0.253428	0.245076	0.334861	0.336365	0.176996	0.226719	0.189	0.235299	0.239063	0.263854	0.345337	0.360714	0.184627	0.260914	0.265341	0.258851	0.309908	0.175363	0.285222	0.399763	0.214029	0.20312	0.231453	0.177096	0.36374	0.133163	0.247488	0.189401	0.201492	0.31377	0.258045	0.228916
Total	100	100	100	100	100	100	100	100	100	100	100	100	100	100	100	100	100	100	100	100	100	100	100	100	100	100	100	100	100	100	100	100	100	100	100	100	100	100	100	100	100	100	100	100	100	100	100	100	100
Pre-normalization total	95.4615	95.1849	99.042	96.6223	96.8094	98.1742	98.4744	98.2924	97.7989	99.3091	99.6307	98.9585	99.6733	98.704	99.8086	99.7755	99.3531	99.743	99.8541	99.3131	98.8218	99.6677	97.9341		98.126	98.3543	99.2007	98.8671	99.3499	96.8769	98.9381	98.2846	98.5464	98.0238	96.6838	99.496	99.8129	95.4836	98.0307	98.4155	96.0303	99.054	95.717	96.5179	97.5242	94.6199	97.3911	99.0545	97.0765
LOI %	4.0155	4.60045	-	2.06756	2.32032	1.06841	-	-	1.41657	-	-	-	-	-	-	-	-	-	-	-	-	-	1.82444		1.87401	1.64566	0.799296	1.13287	0.650126	3.12311	1.06195	1.71537	1.45357	1.97621	2.82847	0.50405	0.187122	4.29356	1.52626	0.601805	3.57035	0.946009	3.16857	2.56827	2.10253	5.05277	1.59843	0.414938	2.52464
XRF ppm
Ni	179.435	193.635	47.619	27.4068	63.9492	54.1185	53.262	56.034	103.471	89.595	49.698	26.532	59.888	65.142	74.7615	62.055	28.71	73.953	49.599	35.64	34.65	152.163	112.01	87	63.3815	63.481	54.6255	48.556	159.697	127.858	53.531	55.2225	184.871	156.713	171.438	100.296	73.63	142.186	153.628	46.168	152.931	19.104	51.939	38.4	91.8385	150.543	44.775	51.6405	71.7395
Cr	237.625	278.139	155.43	1.986	176.456	156.497	91.575	101.178	178.74	176.913	75.339	19.701	153.758	96.426	103.031	170.306	4.752	198.891	75.339	21.285	21.087	164.241	192.841	147	141.191	141.489	144.076	137.808	236.81	140.892	144.474	139.996	173.826	169.548	134.126	16.6165	7.562	43.78	79.5005	134.126	87.56	40.198	80.197	114.7	93.132	59.7995	161.688	154.126	155.718
Sc	29.1942	29.4921	47.223	43.4934	43.5927	43.8906	38.907	41.679	39.9186	39.798	40.095	40.293	41.4685	38.808	39.991	45.901	42.273	41.778	43.758	42.669	44.055	33.165	28.2012	38	36.7155	37.81	37.611	35.82	32.238	30.049	39.5015	38.3075	27.064	28.855	30.7455	26.467	26.268	28.656	30.9445	42.4865	31.044	39.7005	32.9345	44.6	37.9095	30.447	42.984	41.193	41.0935
V	204.359	223.028	369.27	530.163	347.351	340.996	400.455	346.203	290.552	297.891	414.81	420.354	358.245	391.347	394.394	338.545	497.376	336.699	391.941	492.723	491.337	210.276	202.175	308	319.395	323.773	339.394	319.992	258.401	281.684	342.18	348.051	226.064	248.054	254.222	254.421	240.492	255.019	267.655	348.548	257.009	377.304	250.74	346.7	287.853	250.541	351.235	329.345	330.041
Ba	161.76	112.209	264.132	501.862	254.804	284.197	324.126	320.562	215.977	225.027	346.995	415.602	378.142	405.405	405.623	312.639	522.621	272.25	352.539	463.122	440.847	247.896	496.5	217	340.29	335.812	409.542	493.421	348.25	187.259	412.03	409.343	288.849	292.032	134.226	315.216	481.481	177.508	162.185	343.573	142.086	536.106	260.79	293	322.082	190.841	268.849	332.629	241.387
Rb	4.965	3.4755	4.554	9.8307	4.8657	4.965	12.771	12.474	8.4405	9.9	13.266	21.087	9.3575	14.454	12.805	8.077	19.404	6.93	18.513	17.622	17.325	3.762	20.3565	9	15.6975	13.9425	18.72	12.48	6.1425	26.52	18.135	13.3575	7.215	7.8	9.75	7.41	9.2625	4.29	5.655	12.48	3.315	22.1325	3.705	10.388	10.14	17.8425	4.1925	9.4575	5.07
Sr	285.09	236.632	244.53	287.97	287.97	285.885	238.194	225.918	207.537	225.324	232.848	220.374	239.946	259.281	267.132	265.26	249.084	291.753	198.594	219.582	215.424	408.672	295.219	238	408.7	410.933	410.527	415.703	449.398	364.451	411.035	408.599	436.407	407.482	268.34	439.858	501.361	384.241	291.784	263.57	269.76	280.518	365.06	240.006	300.918	632.79	290.667	266.31	259.104
Zr	54.2	48.6	105.6	108.5	85.4	91.4	93.4	122.5	78.1	82.7	92.5	172.3	93.7	96.8	96	97.3	119.3	85.3	132	109.4	111.1	86	98.6	88	118.267	118.679	129.908	154.942	87.773	89.8334	131.247	131.247	79.79	93.2331	59.085	89.6274	112.189	69.69	68.276	112.704	58.782	145.052	78.275	119.474	81.103	66.256	92.615	93.0271	78.376
Y	17.4768	18.5691	32.571	43.3941	29.5914	28.6977	35.739	34.749	26.811	25.344	36.432	41.778	32.308	34.155	34.672	28.8605	42.768	27.819	37.521	40.293	41.877	27.027	20.9523	30	27.1635	29.253	30.646	33.1335	22.487	23.084	29.651	30.3475	20.497	22.487	21.1935	22.885	23.88	22.3875	22.686	33.233	20.895	33.631	23.084	34.8	26.069	21.1935	28.258	29.7505	25.1735
Nb	2.6811	2.3832	5.94	5.8587	5.0643	4.7664	6.138	7.524	4.1706	4.455	4.851	10.989	6.0085	5.742	5.4175	5.91	6.93	4.851	7.524	5.247	5.742	3.069	3.972	6.7	6.4675	5.572	5.6715	9.8505	6.0695	4.776	7.363	6.965	6.4675	7.4625	4.577	5.8705	7.363	5.6715	5.97	7.6615	3.781	11.741	4.8755	7.7	5.771	5.2735	6.169	5.97	4.8755
Ga	13.6041	14.5971	16.731	19.0656	16.5831	17.3775	18.414	16.731	14.7957	16.038	17.919	19.206	16.8435	18.117	17.2375	17.4345	19.8	16.137	19.998	18.909	19.503	16.632	15.3915	18	19.9	19.6015	19.303	19.303	17.2135	17.6115	19.303	19.104	17.2135	16.915	16.4175	18.0095	19.8005	15.323	16.8155	19.303	16.318	19.0045	16.4175	16.1	15.721	16.119	17.512	18.4075	18.8055
Cu	97.8105	98.4063	185.229	225.61	186.287	166.129	193.743	164.241	164.242	148.203	216.909	245.52	189.12	178.101	180.255	180.55	234.927	180.972	228.096	237.006	247.401	108.405	77.0568	176	148.752	149.748	158.702	139.3	76.5155	113.629	158.304	157.906	68.058	89.948	142.683	145.569	140.992	118.007	163.08	203.577	134.126	96.0175	140.394	199.9	160.593	140.494	180.095	173.031	173.23
Zn	65.8359	72.7869	92.862	128.991	86.9868	86.7882	108.108	95.535	76.7589	83.358	104.742	112.563	94.363	104.445	106.675	90.423	131.967	84.843	99	120.582	122.463	90.288	70.2051	84	91.938	94.2265	99.898	110.644	83.381	87.162	102.087	100.197	81.8885	86.6645	81.2915	95.918	100.197	88.555	88.555	94.923	83.6795	106.962	63.1825	92.9	81.59	87.56	88.157	86.0675	80.794
Pb	0.7944	1.5888	2.574	3.3762	2.3832	1.8867	2.376	1.386	2.5818	1.782	4.455	3.465	2.8565	2.772	3.4475	0.8865	4.752	1.881	4.059	3.366	3.267	0.495	4.2699	3	4.0795	3.98	4.975	5.174	3.98	1.4925	5.572	5.6715	3.4825	3.383	1.194	3.98	4.776	3.0845	0.8955	2.985	1.99	4.2785	3.781	1.9	3.6815	1.6915	2.6865	1.6915	2.4875
La	2.2839	1.7874	9.9	7.2489	5.958	10.6251	11.583	8.514	3.6741	9.207	8.91	18.018	8.274	9.504	8.471	8.471	10.692	5.841	13.464	12.771	11.385	9.603	11.4195	4	11.94	11.0445	12.2385	15.721	12.736	7.2635	8.955	16.318	10.4475	11.2435	8.955	13.731	16.2185	6.567	4.6765	10.547	7.2635	15.6215	7.6615	13	8.358	9.552	6.368	12.0395	4.8755
Ce	14.5971	10.6251	25.245	30.1872	15.1929	22.1439	23.166	25.443	14.2992	17.622	18.711	36.63	21.079	23.463	21.079	21.473	27.621	18.612	28.71	22.176	27.72	19.8	24.6264	15	30.1485	29.3525	32.7355	34.7255	26.9645	18.8055	31.044	29.651	22.885	31.442	14.0295	28.3575	36.9145	19.4025	24.676	28.7555	15.0245	34.5265	13.8305	28.1	20.5965	17.91	19.9995	20.497	15.721
Th	0.8937	0.8937	0.99	1.6881	ND	2.0853	2.079	0.891	1.2909	1.089	0.891	2.277	1.4775	1.584	1.97	1.379	2.178	0.693	1.683	1.98	2.376	ND	2.1846	1	1.8905	2.985	2.4875	2.2885	ND	0.597	3.2835	2.0895	0.8955	1.592	1.194	1.4925	1.791	0.6965	1.393	2.4875	0.995	2.4875	0.597	ND	1.791	1.4925	1.0945	ND	ND
Nd	10.2279	7.6461	14.652	17.9733	11.7174	15.7887	15.246	16.434	10.0293	11.385	13.167	21.483	16.0555	14.256	16.4495	15.8585	17.919	12.672	17.919	16.533	16.929	15.246	13.3062	11	19.9995	17.313	21.89	21.3925	18.308	14.0295	18.6065	17.4125	11.94	17.0145	10.4475	14.129	19.6015	9.95	14.328	16.915	8.756	22.089	11.0445	15.9	11.8405	11.4425	14.129	12.736	10.4475
U	1.8867	1.0923	1.386	1.7874	0.993	1.0923	0.99	0.693	ND	1.386	0.594	3.267	ND	1.881	1.576	1.2805	1.881	1.881	1.188	0.891	1.386	1.683	2.1846	ND	0.597	1.592	0.597	0.6965	ND	0.597	0.796	2.189	ND	0.6965	ND	1.0945	1.6915	0.6965	0.796	ND	0.597	0.796	ND	ND	0.8955	1.0945	ND	ND	0.8955
ICP-MS data
Sample ID	CAH15-005	CAH15-007	CAH15-008	CAH15-017	CAH15-018	CAH15-019	CAH15-020	CAH15-021	CAH15-022	CAH15-023	CAH15-024	CAH15-025	CAH15-026	CAH15-027	CAH15-028	CAH15-031	CAH15-032	CAH15-033	CAH15-036	CAH15-037	CAH15-038	CAH15-043	MS-15-18ba	MS-11-6	CAH16-062	CAH16-063	CAH16-064	CAH16-065	CAH16-072	CAH16-073A	CAH16-074	CAH16-075	CAH16-081	CAH16-099C	CAH16-105	CAH16-111	CAH16-112	CAH16-117	CAH16-121	CAH16-122	CAH16-123	CAH16-132	CAH16-138	CAH16-139	CAH16-140	CAH16-142	CAH16-146A	CAH16-148	CAH16-149
La ppm	5.6535	4.98558	9.14445	11.7345	7.86469	8.57787	9.90153	11.1733	6.8168	7.29156	9.45242	16.0067	9.80941	10.7966	10.5811	8.99813	13.0698	7.32137	11.9695	11.7318	11.6486	8.08622	10.7086	7.86	11.5701	11.6072	13.0485	16.4504	12.4021	7.74482	13.1577	13.0887	11.1973	12.1862	6.98919	13.1859	17.9623	8.79083	8.44149	10.4755	7.18285	15.31	7.10647	10.2301	8.88468	7.91377	8.89801	8.88352	6.94532
Ce ppm	12.7544	11.4631	20.5056	26.1575	18.0895	19.4509	22.1758	24.255	15.1531	16.2028	20.7824	34.2105	21.0292	23.3932	22.8205	20.376	28.6248	17.7612	26.1158	25.8043	25.6407	16.0226	22.5096	17.66	26.3944	26.647	29.9623	37.3838	27.3832	18.5117	29.9733	30.065	23.4646	26.6068	15.5099	27.7519	37.1684	19.266	18.4748	23.4875	15.9917	33.8227	15.6518	23.0129	19.5019	17.5557	20.8965	20.1225	16.5775
Pr ppm	1.76175	1.60123	2.92185	3.63056	2.66036	2.78573	3.14647	3.41588	2.12754	2.27624	2.96145	4.71651	2.93225	3.31486	3.29697	2.89717	3.98056	2.6632	3.57665	3.6639	3.62329	2.8255	2.93253	2.52	3.72443	3.81849	4.21767	5.22881	3.8235	2.73799	4.22316	4.25117	3.21934	3.57313	2.15001	3.58595	4.76704	2.65762	2.56138	3.30854	2.1755	4.69663	2.18036	3.26594	2.65697	2.40371	3.06065	2.90878	2.5165
Nd ppm	8.231	7.57214	13.8635	17.2074	12.9817	13.0579	14.8449	15.4329	10.154	10.565	13.8755	20.9355	13.2054	15.2482	15.2585	13.5251	18.3386	13.076	16.0291	16.6531	16.4724	13.1275	12.5098	11.74	17.4009	17.5217	19.3307	23.8384	16.74	13.1803	19.3877	19.5164	13.9777	15.7525	9.89374	15.5519	19.6868	11.9281	11.5443	15.5588	10.1487	21.3715	10.2947	15.283	12.2142	10.8996	14.9802	13.6952	12.2066
Sm ppm	2.32326	2.27749	4.17487	5.17033	3.94851	3.87092	4.49426	4.47611	3.15583	3.17607	4.21053	5.78399	3.87576	4.49124	4.38994	4.01645	5.32191	4.06419	4.76323	4.88375	4.93182	3.67256	3.15989	3.58	4.73569	4.78713	5.18346	6.17808	3.92111	3.80085	5.12164	5.33469	3.47643	3.82804	2.6892	3.85853	4.5287	3.18901	3.15349	4.56129	2.74535	5.77634	3.07478	4.56458	3.57382	3.00868	4.41773	4.1014	3.84759
Eu ppm	0.88907	0.91174	1.51018	1.91716	1.53523	1.51123	1.69796	1.55172	1.15267	1.19298	1.60583	1.9356	1.45446	1.64831	1.64839	1.55775	1.89917	1.69049	1.62246	1.80167	1.74609	1.32862	1.09014	1.32	1.65372	1.67634	1.79803	1.99684	1.39791	1.38319	1.78779	1.7844	1.22902	1.37125	1.04689	1.35027	1.49145	1.15903	1.17817	1.65895	1.05681	2.13112	1.12902	1.65376	1.28871	1.10285	1.85193	1.63555	1.53749
Gd ppm	2.80503	2.77206	5.25758	6.42327	4.85225	4.76598	5.58042	5.5107	3.94678	4.04238	5.3544	6.87981	4.90823	5.44551	5.41928	4.89661	6.61106	4.82561	5.87064	6.22401	6.16432	4.28077	3.50854	4.53	5.26824	5.3788	5.81321	6.53055	4.18139	4.26852	5.85292	5.81597	3.76326	4.13009	3.28615	4.15284	4.37182	3.6223	3.65527	5.56417	3.28744	6.4539	3.7298	5.60866	4.33539	3.45241	5.30564	4.9735	4.5324
Tb ppm	0.495009	0.517326	0.954308	1.15103	0.854055	0.845788	1.01234	0.986286	0.733669	0.733111	0.983102	1.21888	0.907966	0.988833	0.969742	0.884177	1.21405	0.850046	1.07002	1.13176	1.12408	0.768868	0.617005	0.82	0.881782	0.897531	0.978373	1.09078	0.691719	0.739275	0.981167	0.968301	0.618694	0.689919	0.591421	0.673623	0.720308	0.647045	0.667645	0.979087	0.579324	1.10191	0.671195	1.00192	0.755259	0.603363	0.90335	0.880613	0.798984
Dy ppm	3.31455	3.38432	6.31706	7.90356	5.63685	5.43676	6.43847	6.32534	4.82619	4.77944	6.45702	7.99055	5.73857	6.27346	6.30435	5.52809	7.92129	5.32305	6.95171	7.54527	7.51378	4.95286	3.9309	5.38	5.60654	5.59346	6.15567	6.60983	4.35179	4.6534	6.2001	6.22419	3.92689	4.45143	3.91601	4.3626	4.5658	4.08595	4.41327	6.36287	3.77243	6.84377	4.52	6.65702	4.97469	3.9233	5.57212	5.61414	5.02266
Ho ppm	0.703813	0.703092	1.30884	1.69863	1.17317	1.16168	1.4115	1.35068	0.999958	1.02982	1.41789	1.69178	1.26648	1.35565	1.35235	1.15473	1.73034	1.12519	1.49037	1.63158	1.62614	1.04122	0.829807	1.14	1.15273	1.155	1.24869	1.31932	0.890559	0.93949	1.25697	1.22881	0.810893	0.907263	0.815511	0.912013	0.936461	0.886724	0.911948	1.3133	0.808041	1.38828	0.959952	1.36251	1.04291	0.827986	1.12935	1.17774	1.02404
Er ppm	1.99423	1.96165	3.66703	4.80043	3.21427	3.08448	3.89449	3.66764	2.84208	2.84818	3.85368	4.56353	3.45904	3.72695	3.73566	3.17112	4.78022	2.95473	4.12503	4.52265	4.55619	2.92191	2.35471	3.17	3.03667	3.0468	3.32638	3.44829	2.4079	2.46948	3.30449	3.30815	2.19119	2.45538	2.23693	2.44286	2.48758	2.43961	2.55749	3.61242	2.19647	3.68512	2.7036	3.76107	2.86272	2.35954	3.03163	3.13461	2.74703
Tm ppm	0.283587	0.291761	0.525259	0.69258	0.456302	0.445271	0.572624	0.540035	0.412623	0.407116	0.579269	0.662512	0.501675	0.547556	0.537159	0.462125	0.701903	0.418105	0.602869	0.673181	0.669396	0.415158	0.347082	0.46	0.429254	0.432802	0.463808	0.481554	0.348459	0.349605	0.464978	0.462512	0.314788	0.34796	0.337996	0.361443	0.365629	0.356412	0.373982	0.525959	0.322614	0.524143	0.383375	0.548404	0.412723	0.339699	0.431675	0.451181	0.390586
Yb ppm	1.81341	1.78419	3.26909	4.39426	2.78969	2.76745	3.53834	3.34041	2.51631	2.51943	3.57996	4.09396	3.1425	3.3524	3.30382	2.81482	4.39626	2.55238	3.71443	4.25296	4.2162	2.64717	2.27512	2.9	2.63202	2.64543	2.83074	2.96919	2.13338	2.12559	2.86188	2.81873	1.94039	2.14649	2.09433	2.25195	2.26489	2.23772	2.32073	3.25365	1.99381	3.18218	2.40205	3.30861	2.53815	2.10515	2.58565	2.82079	2.39896
Lu ppm	0.290153	0.285947	0.514482	0.715685	0.442811	0.432555	0.565851	0.53731	0.400393	0.403194	0.56975	0.65519	0.488263	0.540838	0.524579	0.442002	0.691756	0.40617	0.59114	0.673755	0.698439	0.436935	0.350933	0.46	0.410095	0.408923	0.434306	0.449235	0.350104	0.342367	0.444157	0.440639	0.316069	0.344105	0.337377	0.351852	0.366745	0.360408	0.373051	0.514996	0.329967	0.504121	0.372915	0.52172	0.400989	0.33453	0.401053	0.436828	0.38674
Ba ppm	159.312	114.055	255.639	504.575	251.007	283.248	324.229	315.49	217.476	222.567	338.252	413.792	375.321	398.706	396.724	309.467	518.084	269.027	350.99	465.06	440.665	238.552	504.578	217	337.124	335.378	406.012	490.92	343.613	182.64	406.441	408.473	286.692	282.82	134.205	317.451	472.292	174.159	155.696	339.167	138.878	528.563	257.938	281.04	315.584	182.599	260.14	326.714	233.51
Th ppm	0.454893	0.378856	0.920579	1.31782	0.689884	1.02506	1.01539	1.24558	0.68697	0.77362	0.995603	1.9788	1.27094	1.20544	1.14749	0.88222	1.78925	0.562451	1.59113	1.48819	1.45091	0.362902	1.95263	0.87	1.46144	1.48166	1.75913	2.24364	0.765374	0.628558	1.80259	1.77091	0.79073	0.812577	0.541278	1.07203	1.27708	0.769935	0.662709	0.948349	0.577138	2.3424	0.860435	0.984042	1.19272	0.678225	0.825614	0.855511	0.588406
Nb ppm	3.21729	2.93365	6.58575	6.36379	5.6	5.81715	5.95756	7.84882	4.50243	4.84591	5.19545	11.7459	6.14709	5.78874	5.71506	6.18993	6.99103	5.3515	7.8597	6.3825	6.39347	2.97644	4.83091	5.28	5.70987	5.72061	6.36352	8.71461	6.12741	4.64096	6.40797	6.44214	5.8667	6.81457	4.54483	6.04567	7.57565	5.05423	5.40872	7.76952	4.5401	10.9783	4.91718	7.43698	5.1932	4.86614	6.44771	6.13431	4.91527
Y ppm	17.6793	18.1684	32.4655	43.0852	29.4572	28.6934	35.7042	34.047	25.8306	25.6838	35.5391	42.2257	31.5871	34.1272	33.731	29.2019	43.3552	27.1326	37.7154	40.8022	41.1655	26.794	21.2895	28.8	28.4346	28.671	30.7715	32.6977	22.2845	23.1575	30.9039	30.9631	20.4607	22.6474	20.5927	22.9523	23.8143	22.3307	23.1163	33.4114	20.0642	34.614	23.8305	34.2092	26.26	21.1463	28.4219	29.0455	25.5619
Hf ppm	1.40967	1.29477	2.78315	3.07237	2.28943	2.51206	2.65324	3.20738	2.10064	2.17996	2.58314	4.52077	2.56328	2.65991	2.61762	2.57624	3.37046	2.31435	3.5493	3.11066	3.0748	2.09426	2.58218	2.36	3.19873	3.20114	3.53476	4.2374	2.24636	2.41083	3.56416	3.55305	2.00902	2.29056	1.57521	2.25616	2.73076	1.8036	1.79021	3.04812	1.55722	3.92086	2.1072	3.09447	2.23223	1.68731	2.52082	2.5517	2.21225
Ta ppm	0.236062	0.208425	0.457918	0.435319	0.383245	0.38742	0.397066	0.492379	0.285657	0.314846	0.344958	0.756128	0.414737	0.386774	0.375953	0.40963	0.484153	0.353306	0.52438	0.437866	0.429505	0.1892	0.355048	0.35	0.44717	0.440349	0.488216	0.643145	0.415623	0.35617	0.487174	0.480194	0.416284	0.477031	0.348242	0.425474	0.487523	0.37369	0.405201	0.533455	0.350545	0.80048	0.354102	0.494115	0.368677	0.336294	0.468572	0.422412	0.364086
U ppm	0.162943	0.111542	0.380021	0.581371	0.279565	0.393953	0.431631	0.457724	0.259215	0.286765	0.384409	0.731985	0.449882	0.473389	0.462018	0.346866	0.770852	0.216543	0.629156	0.63452	0.633502	0.152775	0.825827	0.35	0.546274	0.593511	0.633254	0.825764	0.23449	0.188657	0.639442	0.699146	0.235261	0.263804	0.14309	0.292213	0.340373	0.232973	0.186392	0.383679	0.166352	0.89484	0.394908	0.398032	0.464293	0.210275	0.316877	0.32033	0.224404
Pb ppm	1.30803	1.0929	2.11516	3.78253	1.88996	2.43384	2.78852	2.64131	2.58062	1.69284	2.69599	3.61127	2.97878	3.10123	3.186	2.14545	4.68477	1.30215	3.27469	3.6197	3.67311	0.827273	3.87797	2.1	3.39378	3.41629	4.43549	5.01839	2.83589	1.5162	4.07702	4.16267	2.56004	2.63534	1.13248	2.91787	4.23749	1.48934	1.33283	2.52671	1.20513	4.53718	2.16571	2.34452	2.89402	1.35023	2.01248	2.15867	1.61871
Rb ppm	3.2664	2.46533	3.61904	8.74949	4.03097	4.17518	11.9515	11.8953	8.21087	8.56132	12.0829	19.5654	8.42026	12.462	11.9713	6.70862	18.5613	5.42997	17.5586	16.7036	16.0894	2.34972	18.5821	8.2	14.4351	13.4626	17.9872	12.1504	4.90491	25.6468	18.0589	13.0073	6.2163	6.45075	9.41557	6.66207	7.96259	3.00428	4.15861	12.1813	2.20671	21.6195	2.62676	9.92819	9.38649	16.3342	3.47438	8.86845	3.96245
Cs ppm	0.597317	0.0551691	0.126284	1.48063	0.210629	0.198364	0.396747	0.244358	0.320912	0.199276	0.457736	0.468224	0.239923	0.305145	0.513871	0.304659	1.85784	0.25186	0.446503	0.446481	0.479399	0.0389851	0.556611	0.22	0.394121	0.368654	0.495887	0.211008	0.0838772	1.03096	0.532784	0.320643	0.118832	0.0409315	0.107618	0.128732	0.104883	0.042383	0.0508389	0.637259	0.0649448	0.42486	0.334565	0.156731	0.588993	0.166421	0.110797	0.213224	0.0425942
Sr ppm	288.718	239.363	250.207	294.283	291.749	288.317	241.655	228.211	209.335	224.845	234.314	222.967	242.09	260.446	268.35	268.115	252.889	289.673	200.781	221.291	215.51	405.547	294.69	238	409.662	408.742	409.107	414.183	450.003	362.395	412.986	412.826	433.192	409.553	267.378	441.529	500.982	386.776	291.994	266.028	270.121	285.377	367.208	238.377	300.529	625.325	291.606	266.243	260.852
Sc ppm	29.573	30.6376	47.8743	44.0955	45.6382	43.621	39.4539	42.8259	39.0522	40.008	40.0147	40.7707	41.2797	39.4287	39.4557	43.9737	41.9375	42.6702	43.8091	43.4275	44.2457	34.1048	29.5825	38.3	38.0547	37.3461	39.6756	35.4322	33.2902	31.9705	40.0128	39.6038	27.3475	29.7468	31.3444	27.8813	25.3408	30.3336	31.7115	44.1405	32.2448	39.4705	34.9114	45.6009	38.9205	29.7779	43.7398	43.0772	41.5081
Zr ppm	52.8064	48.3942	106.501	110.767	85.3701	92.8335	93.0368	124.167	77.2082	80.4318	91.731	177.145	92.1445	96.1034	94.7102	96.6669	120.802	83.7031	134.355	109.635	110.533	84.1515	98.3842	87	119.229	119.039	132.203	157.547	86.4003	89.8179	133.886	133.327	79.3808	92.6418	58.9139	88.4465	111.582	68.886	68.2791	114.652	58.7143	149.695	80.0962	119.38	82.2739	64.6965	92.6688	93.9284	78.9196
1 Location corresponds to the original mapped distribution of PGB versus the extended spatial distribution identified as part of this study.
2 This assignment is the result of the PCA prediction when geochemical data for this sample were compared against the original PGB dataset of Bailey, 1989.
3 If not this study, sample collected as part of specified study.
LOI - loss on ignition
ND - not detected
[truncated: 100 more columns]
