# Supplementary material
Source: publisher figshare collection journal article supplement (https://gsapubs.figshare.com/articles/dataset/_/21620850)

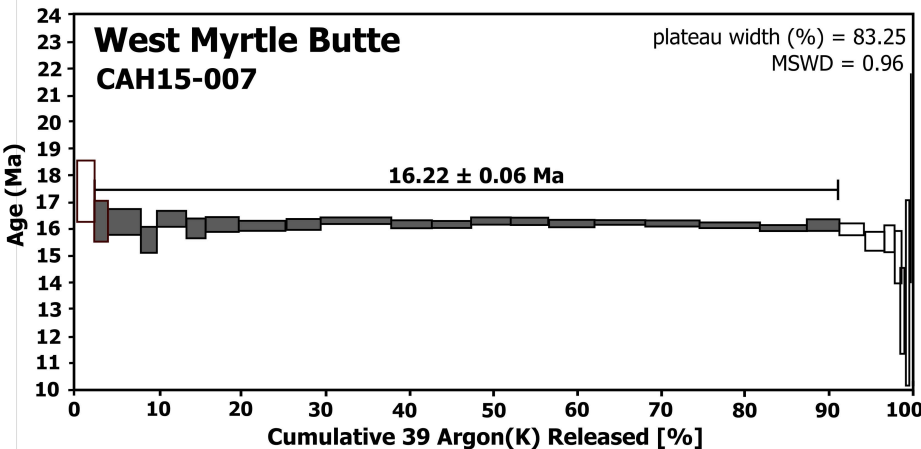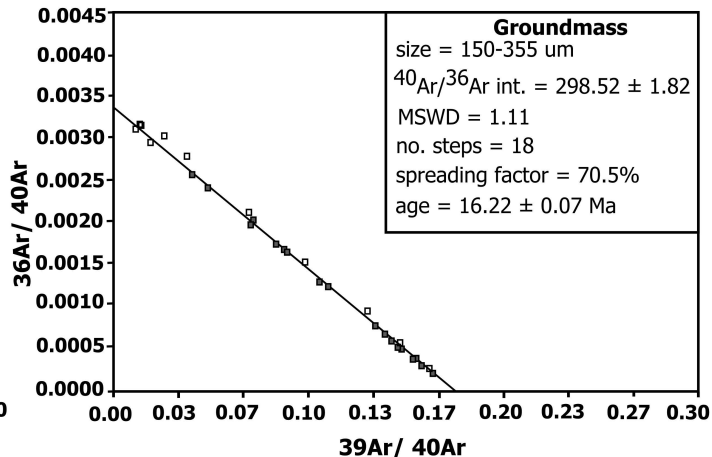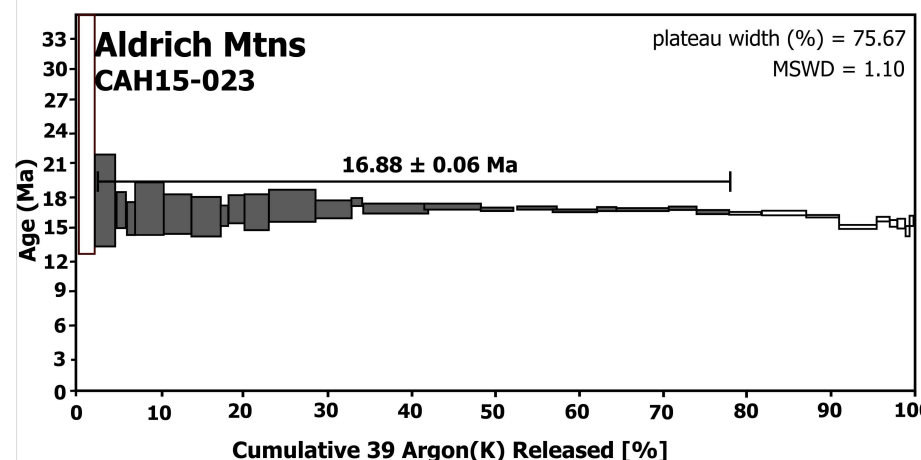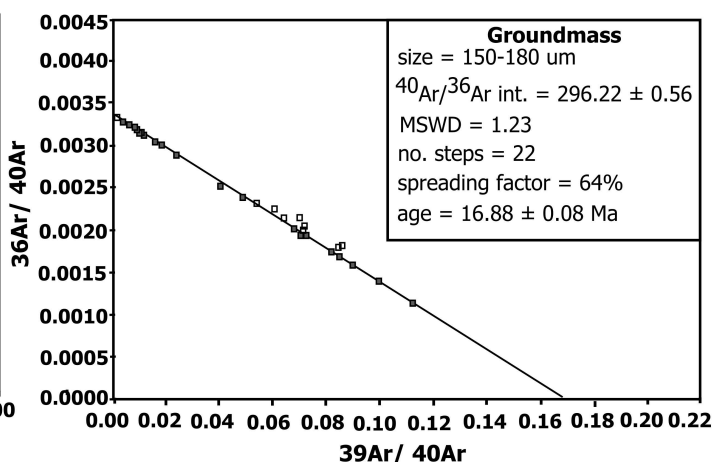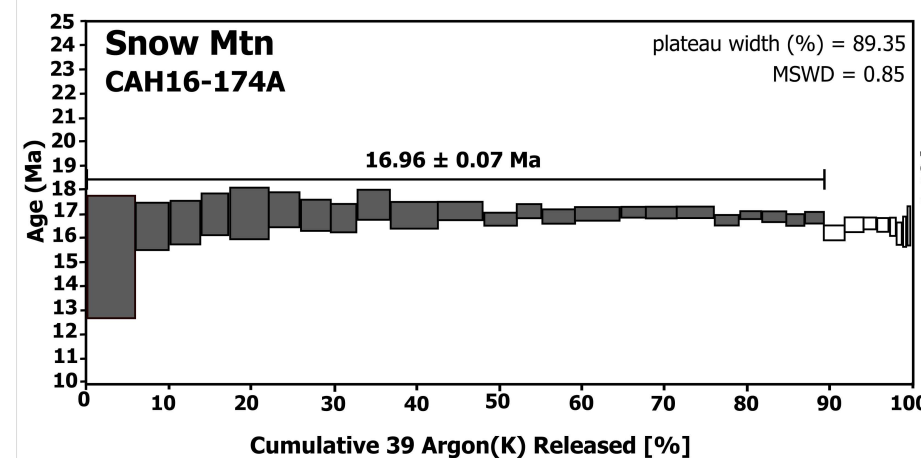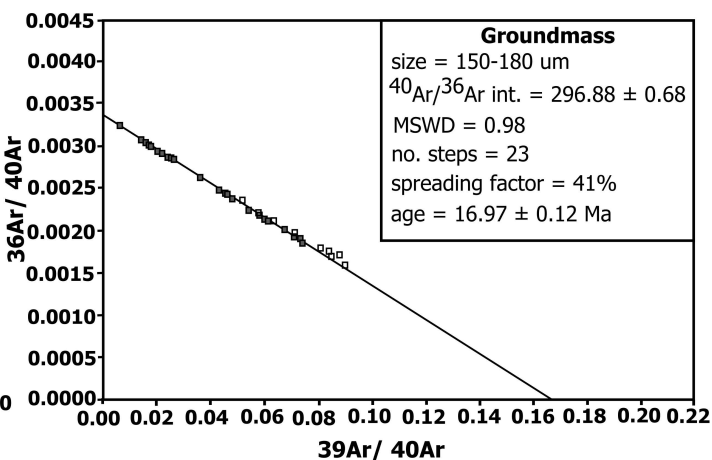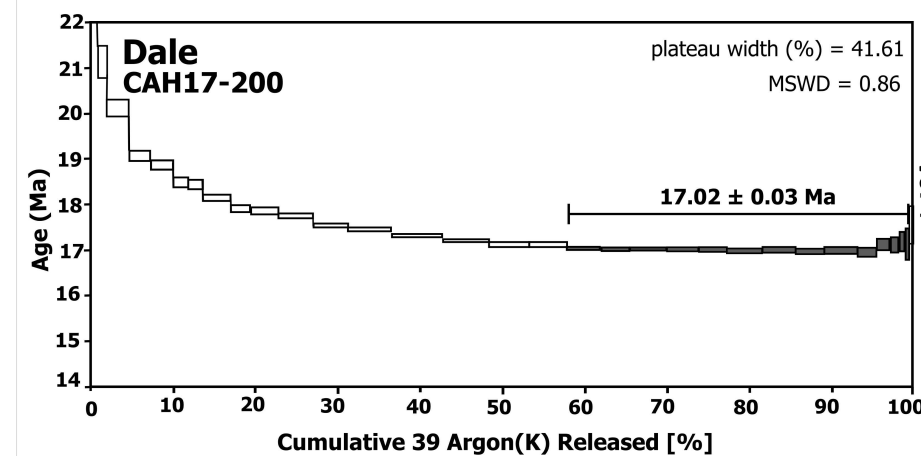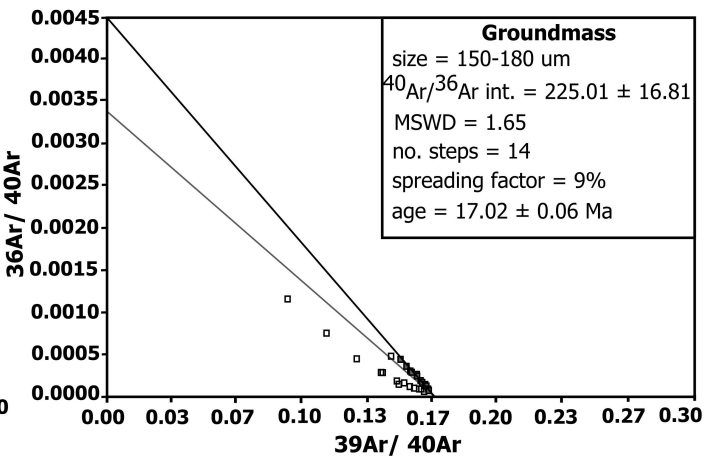

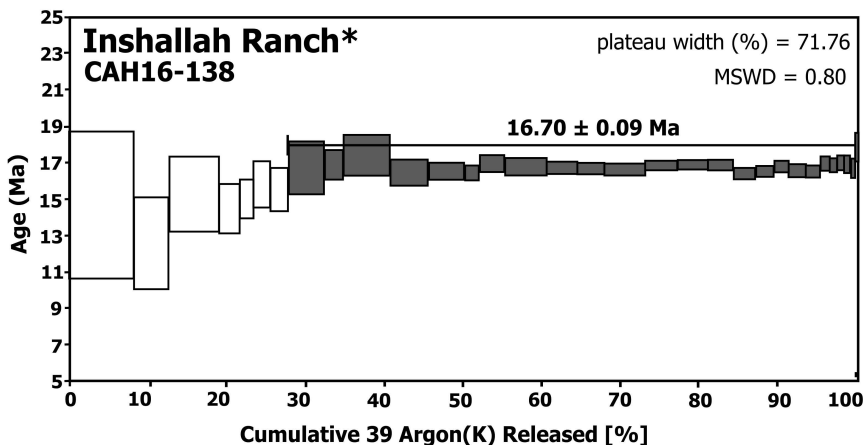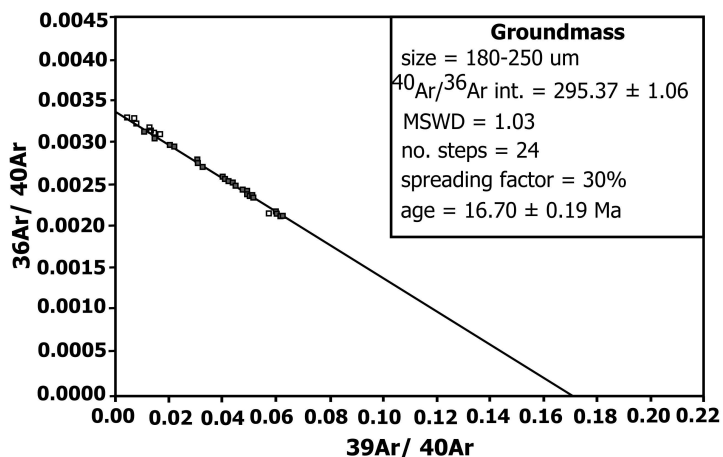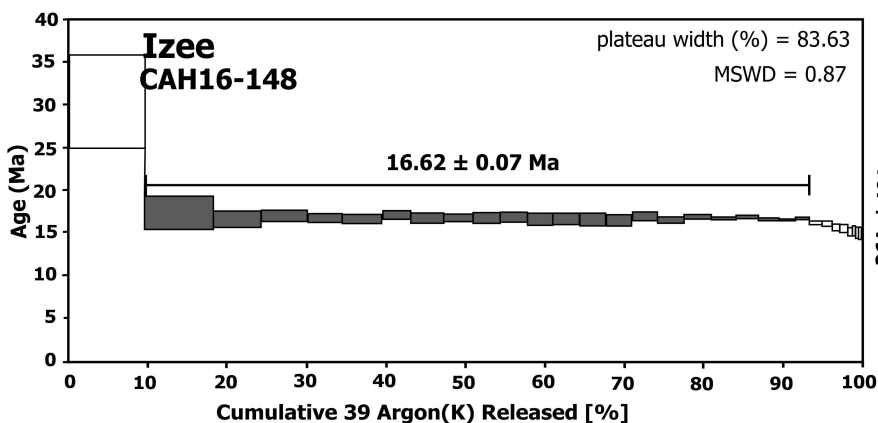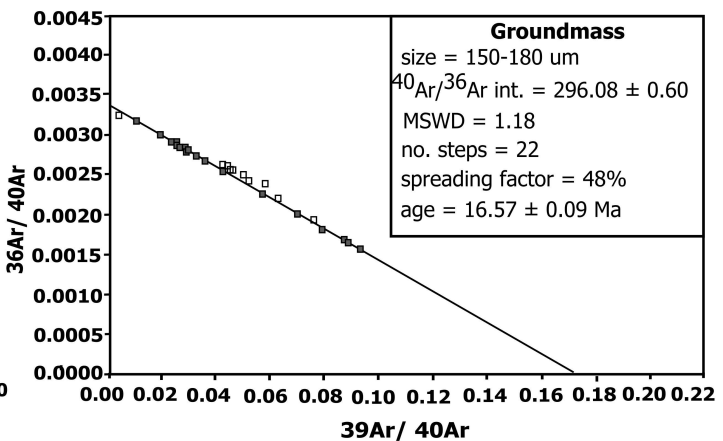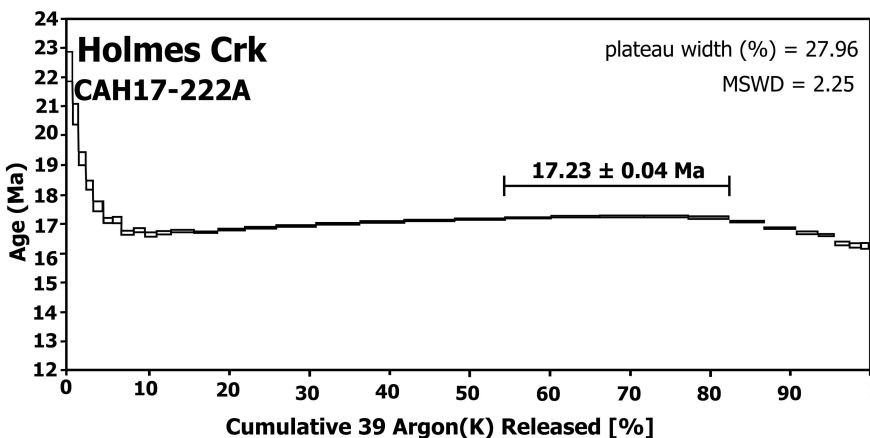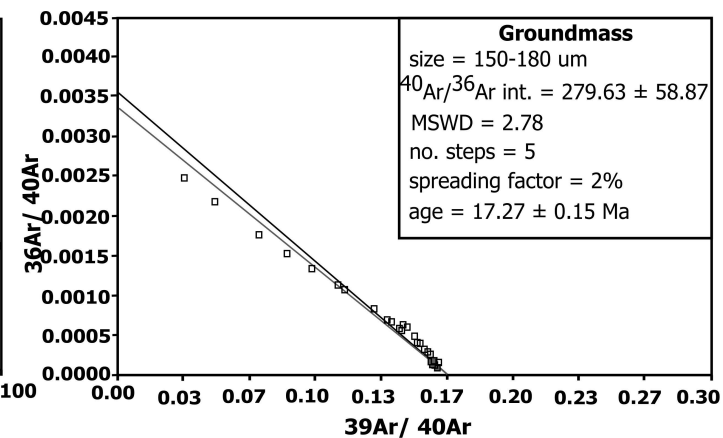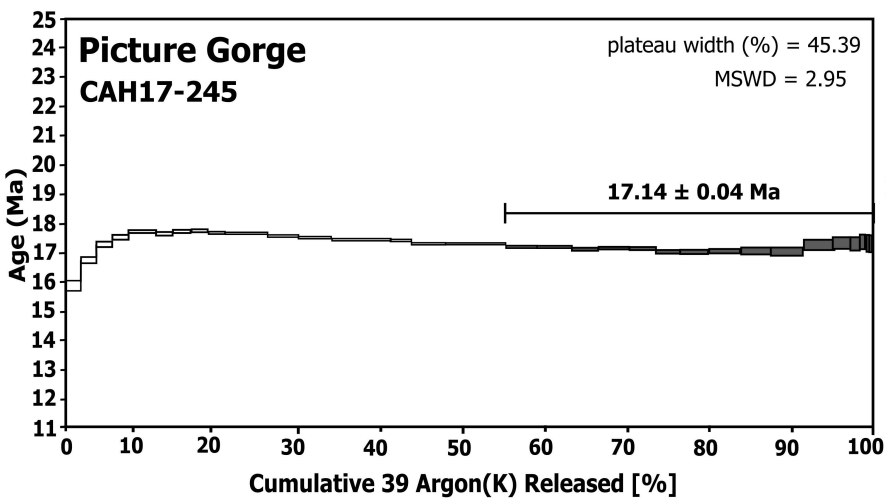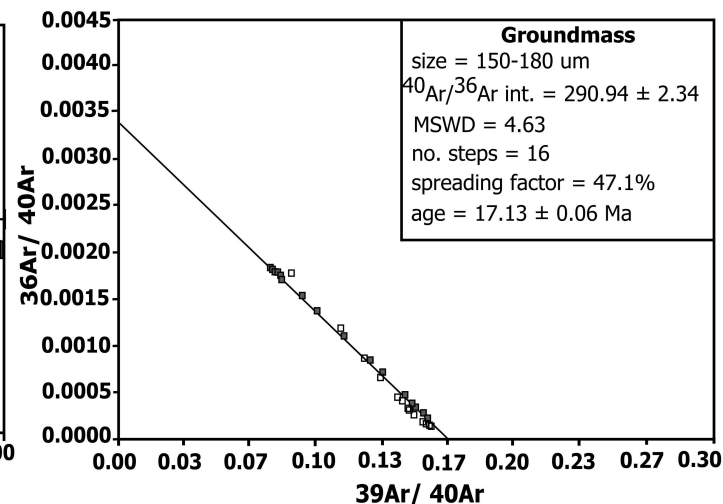

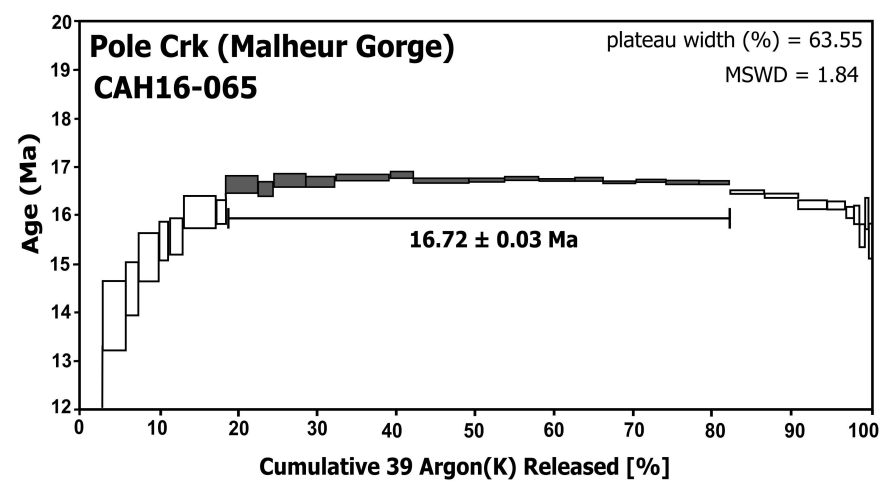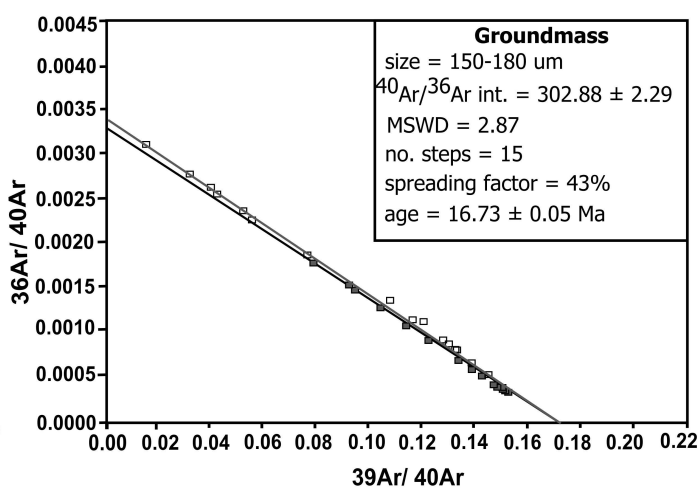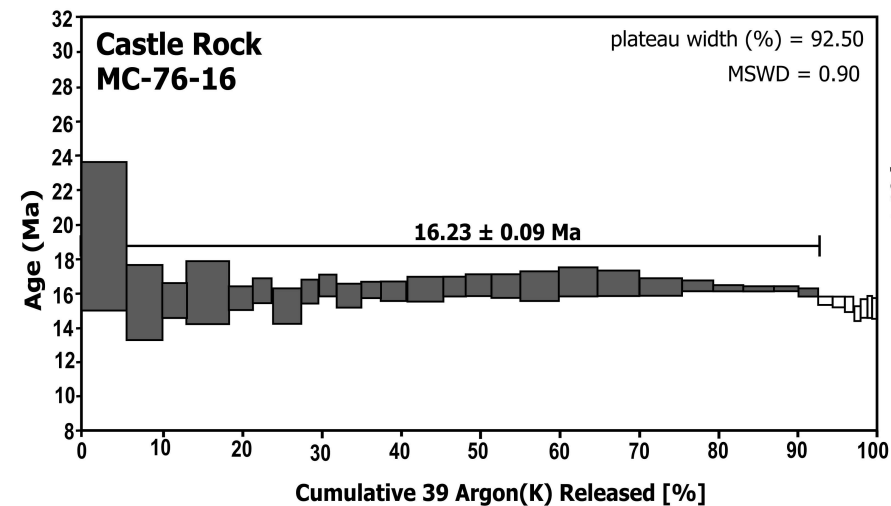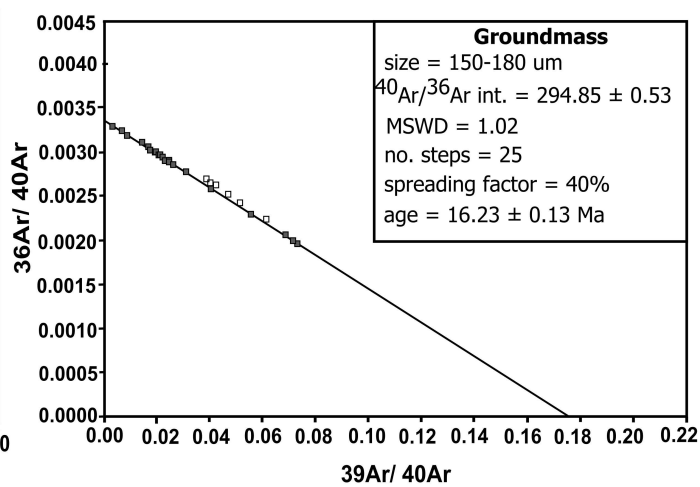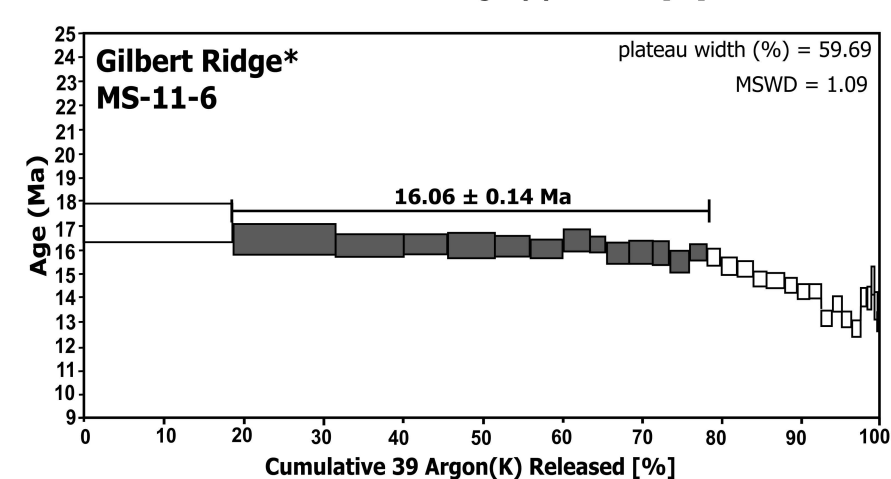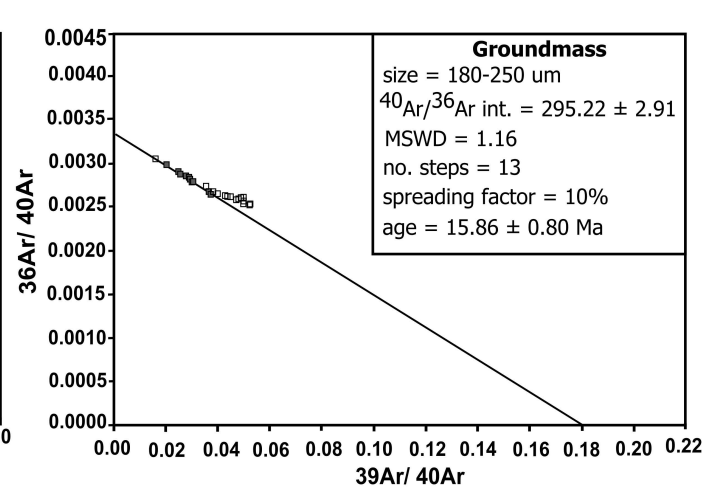

\*Dike

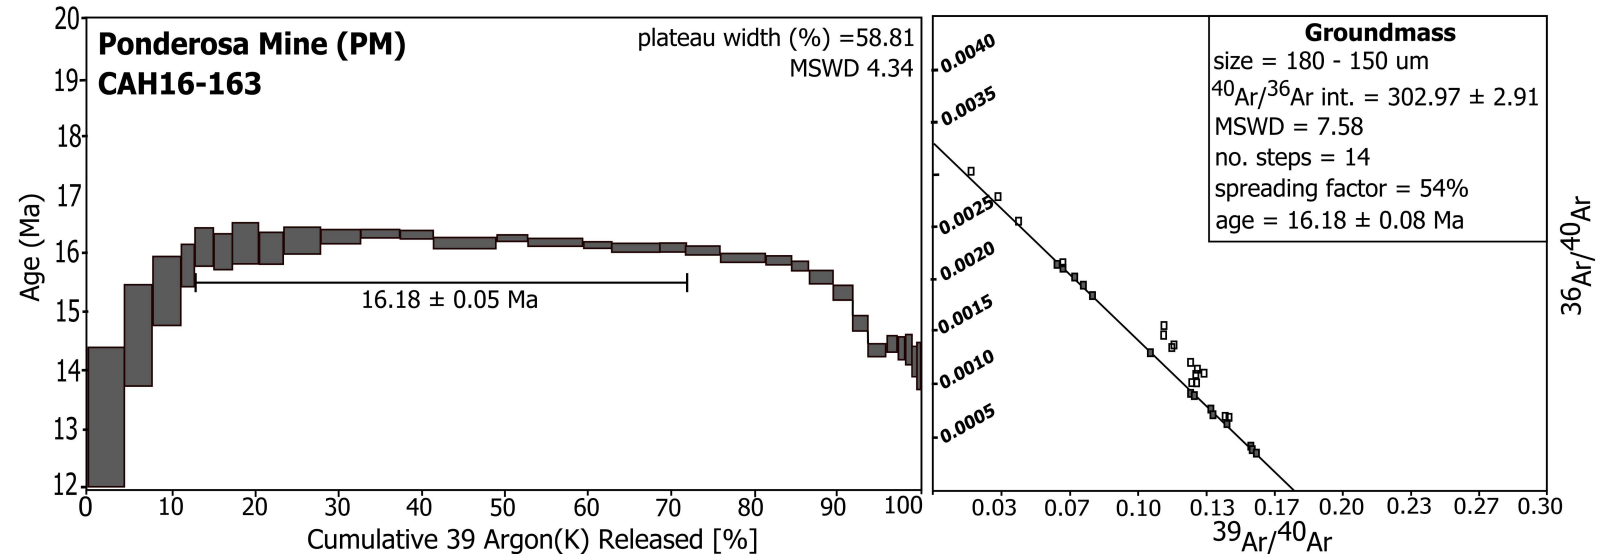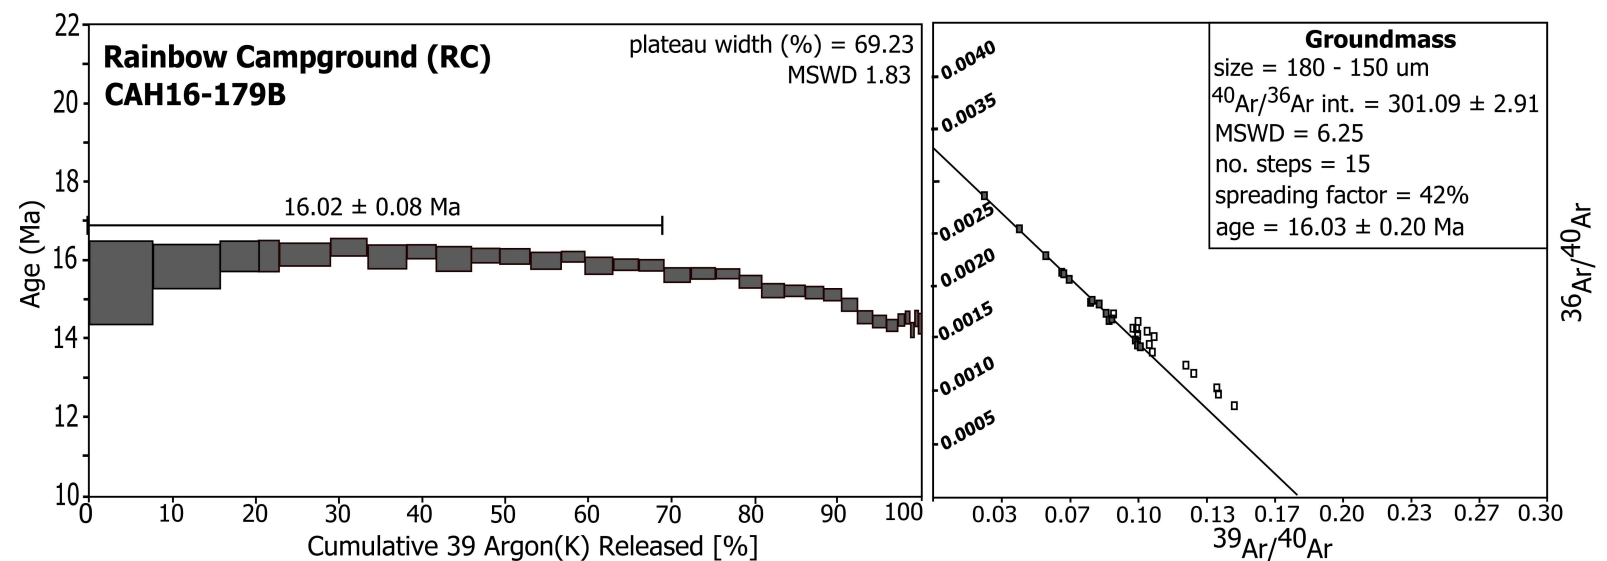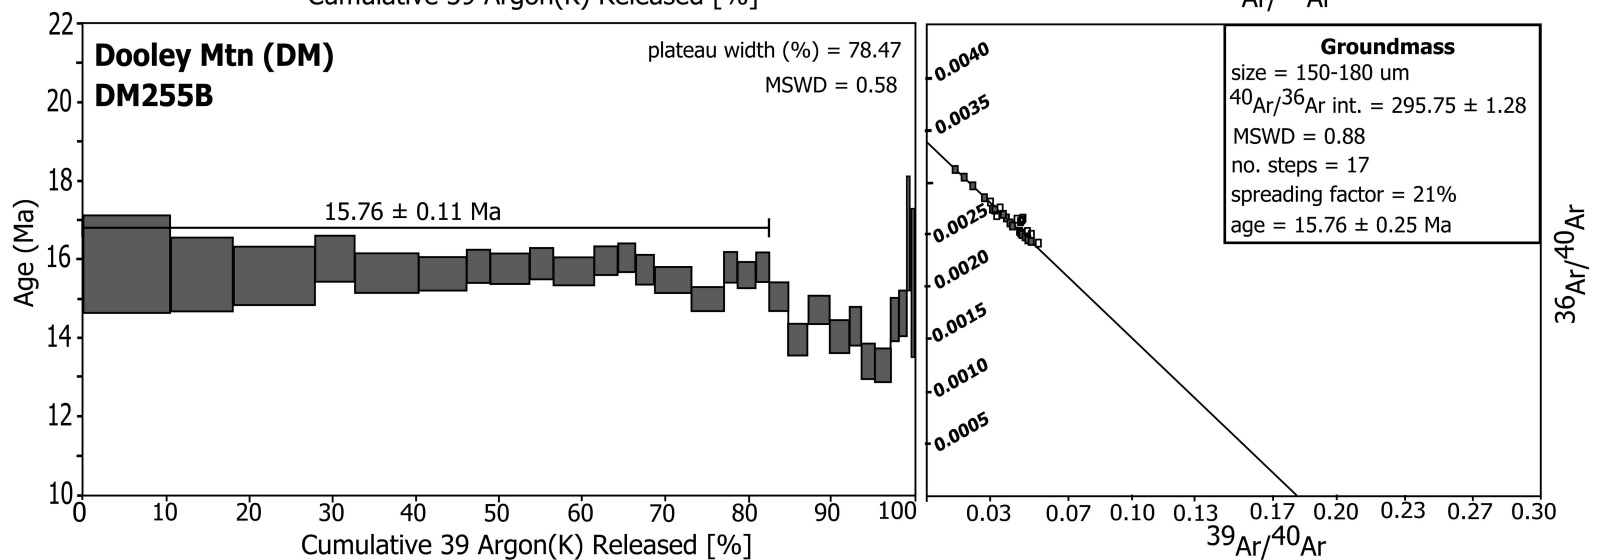

Supplement: Supplementary file 1 [file 2]
